# Supplementary material
Source: publisher figshare collection journal article supplement (https://tandf.figshare.com/ndownloader/files/34694890)
Supplement: Supplementary file 1 [file 34694890]

## Sheet: Sheet1
Journal of Vertebrate Paleontology
Postcrania and paleobiology of Patriofelis ulta (Mammalia, Oxyaenodonta) of the Bridgerian (Early-Middle Eocene) of North America
ANNE E. KORT, HEATHER AHRENS, P. DAVID POLLY, and MICHAEL MORLO
TABLE S5. Raw landmark coordinates for lumbar shape in anterior view.
Common Name	Scientific Name	Catalog Number	X1	Y1	X2	Y2	X3	Y3	X4	Y4	X5	Y5	X6	Y6	X7	Y7	X8	Y8	X9	Y9	X10	Y10
Nine-Banded Armadillo	Dasypus novemcinctus	WRAZL 8610148	0.474237	0.886617	4.23377	1.02408	2.47428	0.474237	2.40555	2.07565	2.91415	2.87291	1.83509	2.86604	2.75607	2.57737	2.03441	2.56363	3.21656	2.94852	1.51893	2.87979
American Badger	Taxidea taxus	WRAZL 9010138	0.97281	1.86756	4.2035	1.91559	2.6482	1.00283	2.58215	2.66622	3.9693	4.13144	1.201	4.0774	3.21868	3.43486	1.93361	3.42285	4.50976	4.28757	0.678565	4.21551
American Beaver	Castor canadensis	WRAZL H25	2.47206	3.5831	9.90214	3.9303	6.30515	0.62496	6.0135	5.15245	7.8745	7.51341	3.79142	7.1801	7.22176	7.04122	4.56915	6.97178	8.9161	7.69395	2.74982	7.1801
Bison	Bison bison	WRAZL 9810423	17.1195	14.5703	29.8654	15.1452	23.9173	2.29926	23.5675	20.2435	28.216	24.6671	18.2192	24.2172	25.3669	24.7671	21.0183	24.5921	30.6652	23.6174	16.0948	22.6677
Bobcat	Felis rufus	WRAZL 0210001	3.01312	2.60224	7.57389	2.7392	5.68384	0.725888	5.19078	4.06771	6.38234	7.21779	3.51987	7.03974	6.09472	5.45101	4.0951	5.34144	7.2041	7.58758	2.69811	7.36845
White-tailed Deer	Odocoileus virginianus	WRAZL 9910233	6.09104	2.84763	9.24757	2.96347	7.76101	0.917035	7.69344	4.1894	9.26688	5.75319	5.89798	5.56978	8.41742	5.06783	6.89224	4.97129	9.83641	5.90764	5.3188	5.68562
Domestic Goat	Capra hircus	WRAZL 9710078	3.95024	1.9329	6.47427	2.01735	5.26386	0.309639	5.1888	2.65539	6.30538	3.98778	4.0816	3.94086	5.73301	3.3122	4.6352	3.28405	6.80267	3.88456	3.61246	3.83765
Guinea Pig	Cavia porcellus	WRAZL 9610245	0.631625	0.337125	1.395	0.36425	1.01137	0.197625	1.00362	0.50375	1.2555	1.01137	0.701375	0.99975	1.14312	0.868	0.8215	0.8525	1.40663	1.08112	0.53475	1.04238
Domestic Horse	Equus caballus	WRAZL 881012	7.87262	5.1058	11.5142	5.23891	9.78373	0.66556	9.53652	6.57003	11.8375	9.35587	6.81724	8.909	10.3827	8.39556	8.48114	8.23393	12.8643	8.95654	5.85693	8.40507
Rock Hyrax	Procavia capensis	WRAZL 0010011	0.725389	0.763126	2.25583	0.771512	1.46755	0.239001	1.4969	0.997934	2.01264	1.81557	0.997934	1.83653	1.83653	1.49271	1.14888	1.48432	2.26003	1.94136	0.758933	1.94555
Virginia Opossum	Didelphis virginianus	WRAZL 9710249	0.638274	0.817908	2.01419	0.710892	1.54409	0.217854	1.38739	1.46765	1.85749	2.04859	0.848484	2.02566	1.58231	1.76576	1.15424	1.73901	2.04095	2.06388	0.672672	2.0333
North American Otter	Lontra canadensis	WRAZL 9010009	1.3791	1.01134	3.31444	1.0711	2.38584	0.262029	2.36286	1.56758	3.09378	2.40883	1.56298	2.34907	2.72142	1.9905	1.97671	1.95372	3.35581	2.53295	1.30095	2.4594
Collared Peccary	Pecari tajacu	WRAZL 9210299	2.64661	2.49343	5.26769	2.66363	4.1699	0.28934	3.97417	3.01254	4.86772	4.24649	2.85936	4.13586	4.4252	3.77844	3.46357	3.79546	5.38683	4.36563	2.34876	4.14437
Polar Bear	Ursus maritimus	WRAZL 9710081	8.75276	7.23243	24.1298	7.92744	16.5499	1.80268	15.8549	12.9662	22.8701	19.6557	8.51385	18.7001	18.4829	16.0503	13.1183	15.7463	25.194	20.0684	6.29851	18.3308
North American Porcupine	Erethizon dorsatum	WRAZL T25	0.399228	0.732564	2.48839	0.821712	1.50001	0.333336	1.47288	1.11629	2.16668	1.88374	0.728688	1.81009	1.81009	1.87211	1.09691	1.83335	2.57366	1.94963	0.32946	1.89149
European Rabbit	Oryctolagus cuniculus	WRAZL 8410118	1.53785	0.526608	2.99174	0.614376	2.27815	0.259488	2.23236	1.29744	2.72844	2.06064	1.63325	1.98814	2.43842	1.67904	2.01485	1.67904	2.91924	2.22091	1.431	2.13696
Common Raccoon	Procyon lotor	WRAZL 9610344	1.02919	0.49654	2.22992	0.501054	1.66567	0.198616	1.62955	0.99308	2.24797	1.67469	0.99308	1.62504	1.94102	1.45802	1.28649	1.44899	2.5143	1.70178	0.731268	1.59796
Tasmanian Devil	Sarcophilus harris	WRAZL 9310970	0.781728	0.436848	2.37584	0.494328	1.56729	0.13412	1.49831	1.47532	2.16125	2.26471	0.835376	2.14975	1.84319	1.90067	1.12661	1.90834	2.37584	2.32219	0.65144	2.22639
Grey Wolf	Canis lupus	WRAZL 9910092	4.40984	2.14128	6.9105	2.32846	5.77248	0.381837	5.5853	3.88575	7.06024	5.52541	3.90073	5.33074	6.34149	4.46974	4.75425	4.34995	7.44956	5.67515	3.49643	5.39813
Wolverine	Gulo gulo	WRAZL 9310464	1.0921	0.87552	3.02285	0.94464	2.02752	0.225792	2.02291	2.00909	3.02746	3.1703	0.999936	3.16109	2.55744	2.44224	1.4423	2.42842	3.3961	3.24864	0.626688	3.19334
Harbor Seal	Phoca vitulina	WRAZL 9510001	16.7707	12.3096	9.74485	12.1039	13.4538	13.1003	13.3124	10.8183	11.3647	6.5437	15.5172	6.55656	12.2261	8.49782	14.508	8.61352	10.6898	6.24159	16.1921	6.21588
NA	Patriofelis ulta	UMNH VP 550	6.49525	9.54324	5.8428	4.89335	3.4083	7.00649	9.13424	7.32784	11.8219	5.72107	11.8365	9.04173	10.2882	6.79712	10.3904	7.85857	11.8706	4.61094	12.1676	10.0545
Cougar	Puma concolor	WRAZL 0110164	16.6363	2.37662	19.984	9.07203	22.8206	3.21993	15.8185	7.02762	11.9086	11.4998	9.83868	7.41095	14.6686	9.32757	13.3142	6.59319	11.9086	12.4708	9.04647	6.79763
